# Supplementary material for: Optical activity of SiC nanoparticles prepared from single-handed helical 4,4′-biphenylene-bridged polybissilsesquioxane nanotubes
Source: Royal Society of Chemistry journal article supplement (doi:10.1039/c5nj01027f), 2015-01-01
Supplement: c5nj01027f1.pdf [file c5nj01027f1.pdf]

*Electronic Supplementary Information (ESI)*

## Optical activity of SiC nanoparticles prepared from single-handed helical 4,4'-biphenylene-bridged polybissilsesquioxane nanotubes†

Chuanyong Zhang,<sup>a</sup> Baozong Li,<sup>a</sup> Yi Li,<sup>a</sup> Mingliang Wang<sup>b</sup> and Yonggang Yang<sup>\*a</sup>

<sup>a</sup>Jiangsu Key Laboratory of Advanced Functional Polymer Design and Application, College of Chemistry, Chemical Engineering and Materials Science, Soochow University, Suzhou 215123, P. R. China. E-mail: ygyang@suda.edu.cn; Fax: +86 6588 2052; Tel: +86 6588 0047; <sup>b</sup>School of Chemistry and Chemical Engineering, Shenzhen University, Shenzhen 518060, P. R. China

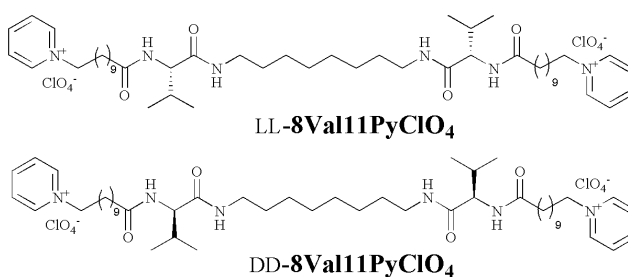

Fig. S1 Molecular structures of the LMWGs.

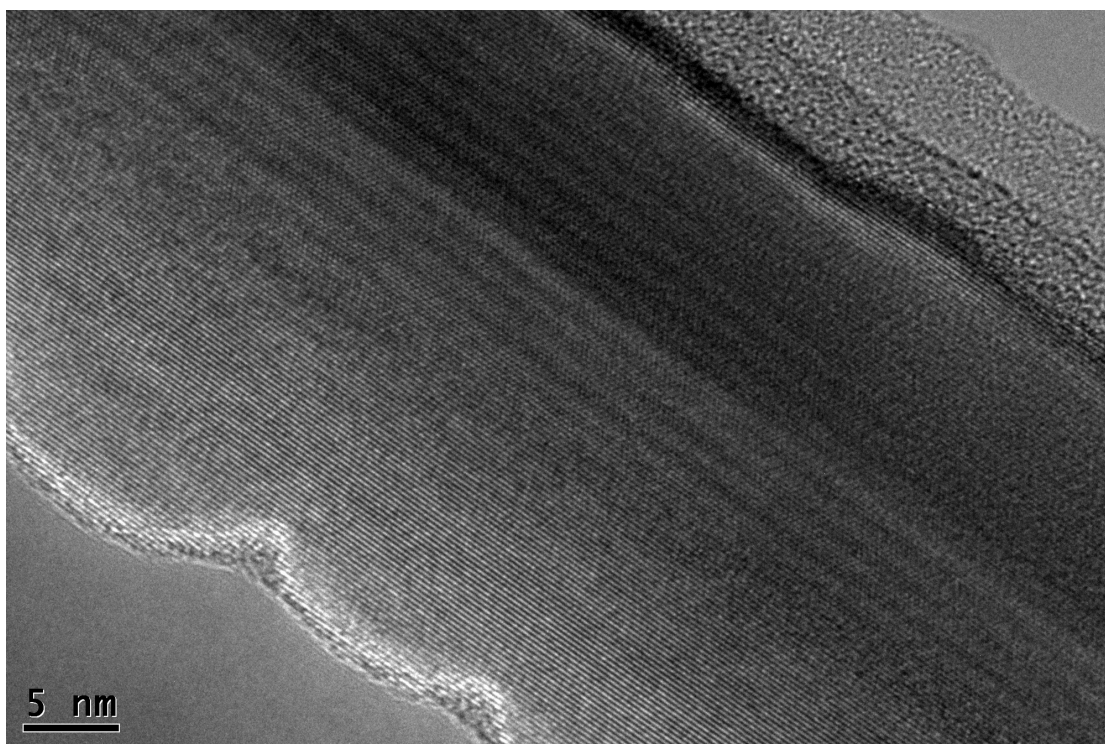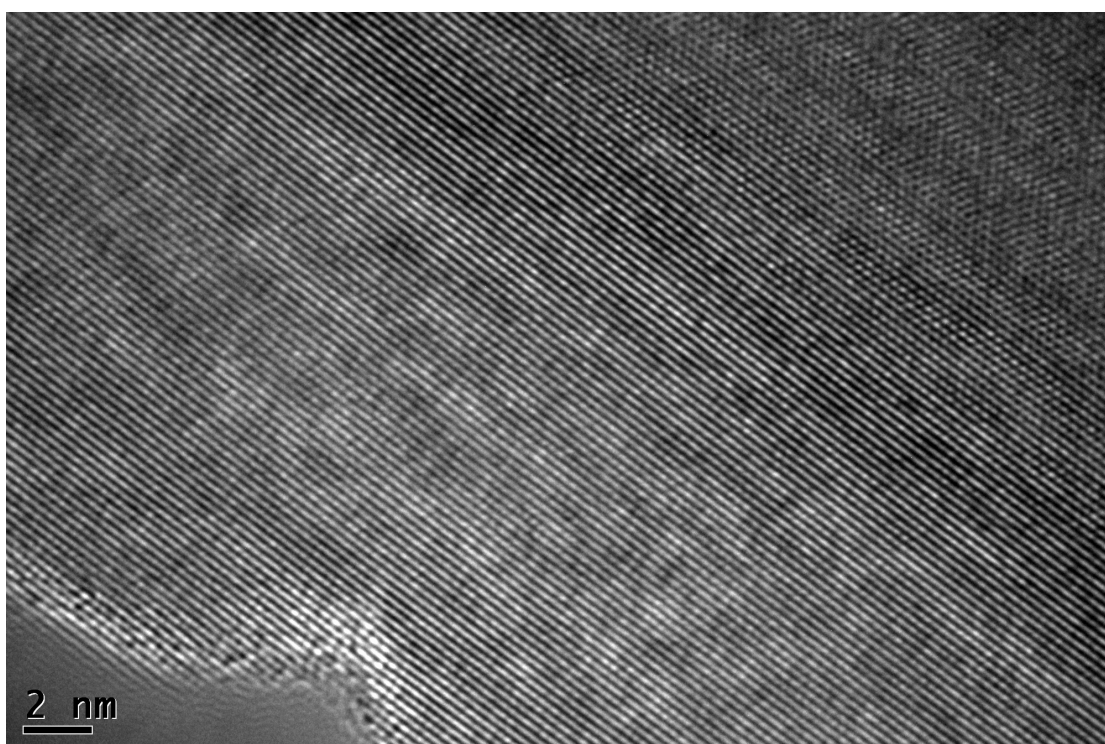

Fig. S2 HRTEM images (up and down) of the SiC nanoparticles.

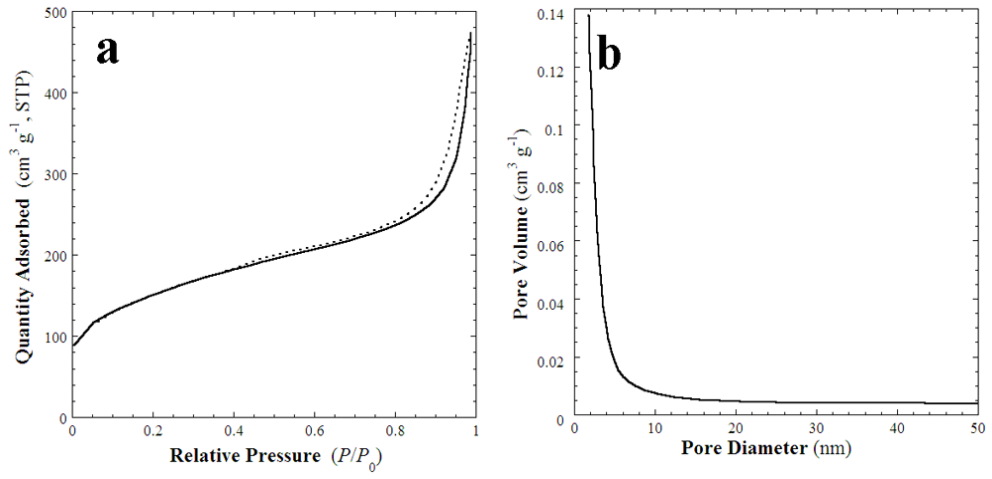

Fig. S3 (a) Nitrogen adsorption-desorption isotherms of the right-handed helical SiC/C nanotubes, and (b) BJH pore-size distribution determined from the desorption branch.

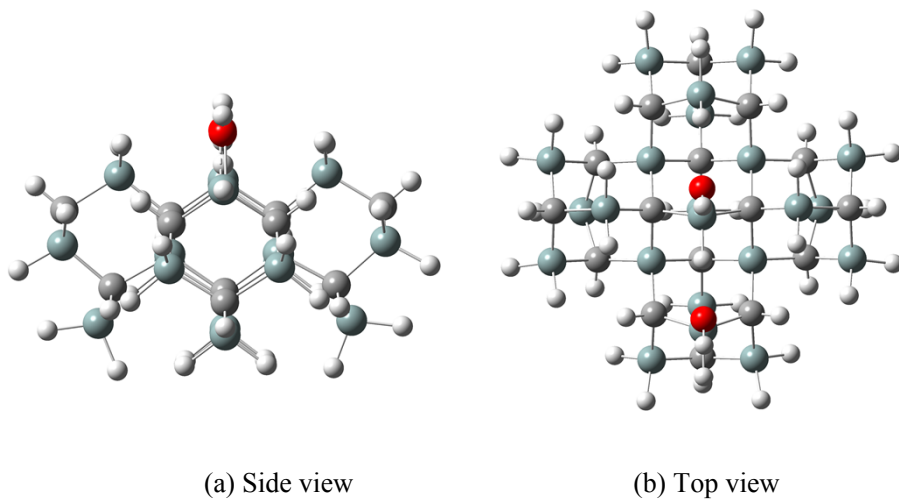

Fig. S4 (a) Side and (b) top views of the SiC cluster used to model the real system.

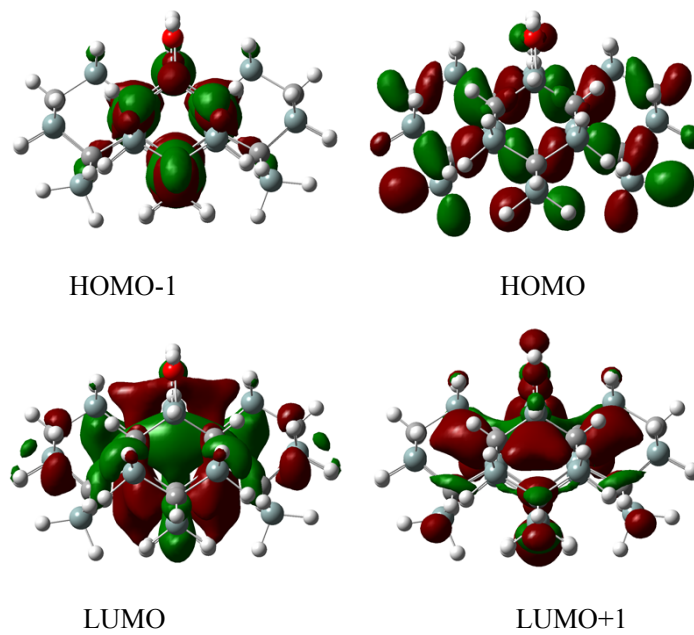

Fig. S5(a) Side view of the two HOMOs and the two LUMOs.

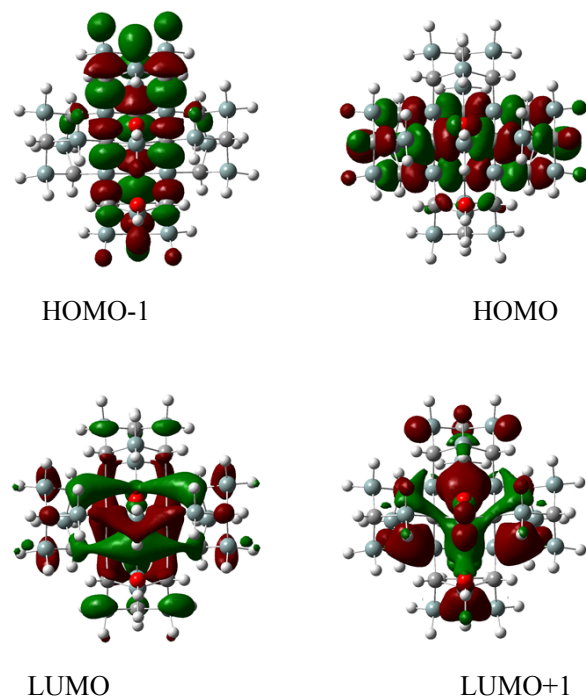

Fig. S5(b) Top view of the two HOMOs and the two LUMOs.
